# Supplementary material for: Computational analysis of pathological images enables a better diagnosis of TFE3 Xp11.2 translocation renal cell carcinoma
Source: PubMed Central journal article supplement (PMC7156652; doi:10.1038/s41467-020-15671-5), 2020-04-14
Supplement: 41467_2020_15671_MOESM1_ESM.pdf [file 41467_2020_15671_MOESM1_ESM.pdf]

## **Supplementary Information**

**Computational analysis of pathological images enables a better diagnosis of  
TFE3 Xp11.2 translocation renal cell carcinoma**

**Cheng et al.**

**Supplementary Figures: 1 - 4**

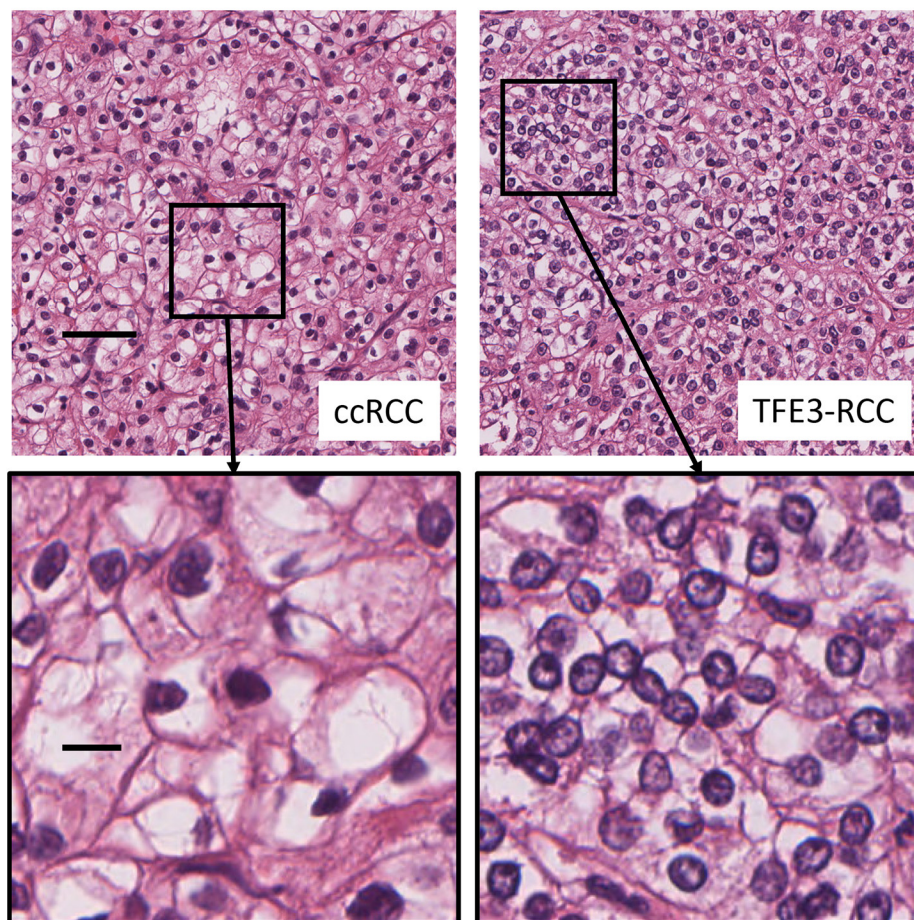

**Supplementary Fig. 1** Image patches illustrating more cell clumps in TFE3-RCC than in ccRCC. This can be inferred by our cell density related image features such as `distMean_bin1` and `distMean_bin2`. Scale bars: 50  $\mu\text{m}$  (first row) and 10  $\mu\text{m}$  (second row).

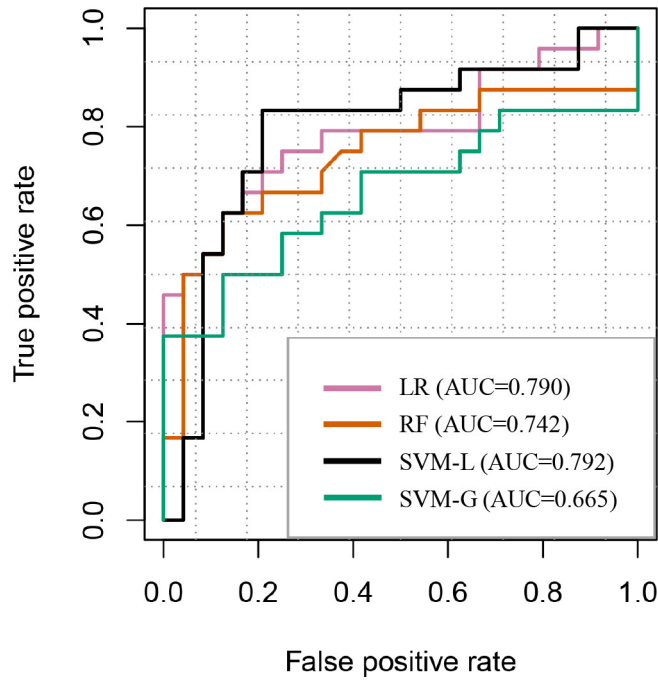

**Supplementary Fig. 2** ROC curves for classifying TFE3-RCC and ccRCC. Models were trained using dataset 1 and evaluated using dataset 2 without transforming the color appearance of the slides in dataset 2 into that in dataset 1. The 95% confidence intervals for the AUCs: LR (0.657-0.923), RF (0.591-0.894), SVM-L (0.652-0.931), and SVM-G (0.501-0.829). LR, logistic regression; RF, random forest; SVM-L, SVM with linear kernel; SVM-G, SVM with Gaussian kernel.

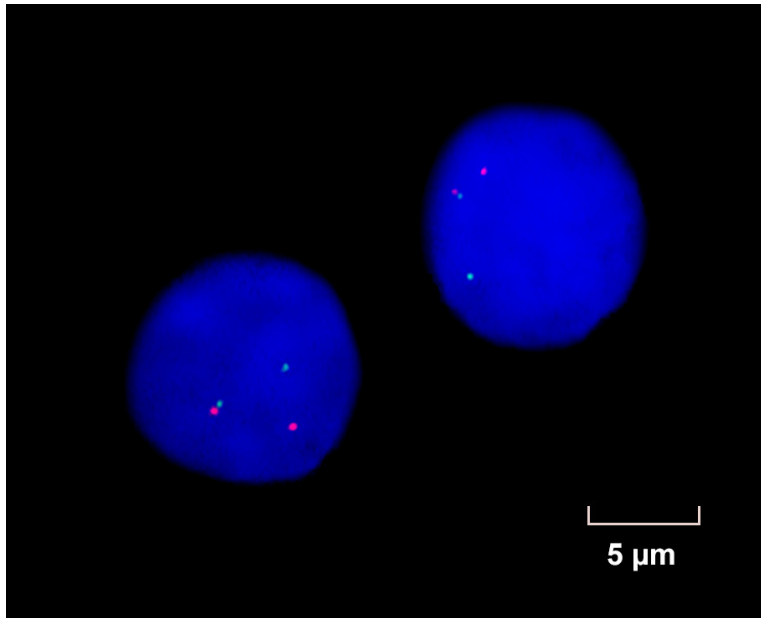

**Supplementary Fig. 3** A positive result of the TFE3 break-apart FISH assay. The TFE3 fusion results in a split-signal pattern.

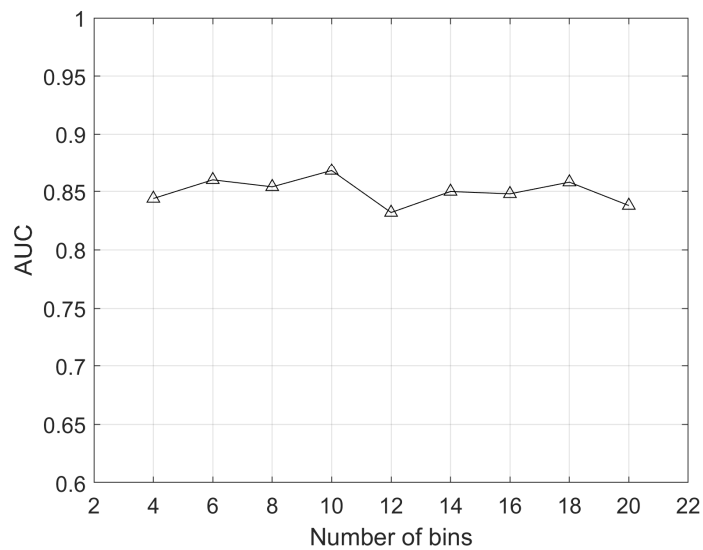

**Supplementary Fig. 4** Plot of AUC vs number of bins. A five-fold cross-validation (CV) approach is used to choose the number of bins on dataset 1. The vertical axis represents the average AUC of five-fold CV using a logistic regression classifier for each of the numbers ranging from 4 to 20. The classification performance is robust in this bin size range, and this number is set to 10 in our study.
